# Supplementary material for: Gold nanoparticle conjugated PLGA–PEG–SA–PEG–PLGA multiblock copolymer nanoparticles: synthesis, characterization, in vivo release of rifampicin
Source: Royal Society of Chemistry journal article supplement (doi:10.1039/c3tb21113d), 2013-10-31
Supplement: c3tb21113d.pdf [file c3tb21113d.pdf]

# **Gold Nanoparticle Conjugated PLGA-PEG-SA-PEG-PLGA Multiblock Copolymer Nanoparticles: Synthesis, Characterization, In-vivo Release of Rifampicin**

**Mani Gajendiran,<sup>a</sup> Sheik Mohammed Jainuddin Yousuf,<sup>b</sup> Vellaichamy Elangovan,<sup>b</sup> Sengottuvelan Balasubramanian<sup>a, \*</sup>**

*<sup>a</sup>Department of Inorganic Chemistry, Guindy Campus, University of Madras, Chennai, India – 600025.*

*<sup>b</sup>Department of Biochemistry, Guindy Campus, University of Madras, Chennai, India–600025.*

\*Corresponding author: E-mail - [bala2010@yahoo.com](mailto:bala2010@yahoo.com)

**Supplementary Material**

### 1. Green synthesis of CPEG stabilized AuNPs

The reduction of Au (III) to Au (0) is facilitated by citric acid units present in the CPEG dendron at pH 8.5. It was very interesting to monitor the rapid formation of AuNPs with the addition of CPEG dendron at 80 °C. The synthesized AuNPs were examined by UV-Visible spectral analysis and the result is shown in the Fig.S1a. The AuNPs colloidal solution shows the surface plasmon resonance (SPR) absorption at 530 nm. The TEM images in Fig.S1b indicate that AuNPs are uniformly arranged on the CPEG polymer matrix and confirm that the CPEG stabilized AuNPs are about 17 nm with spherical shape. The scheme of AuNPs synthesis using CPEG is given below.

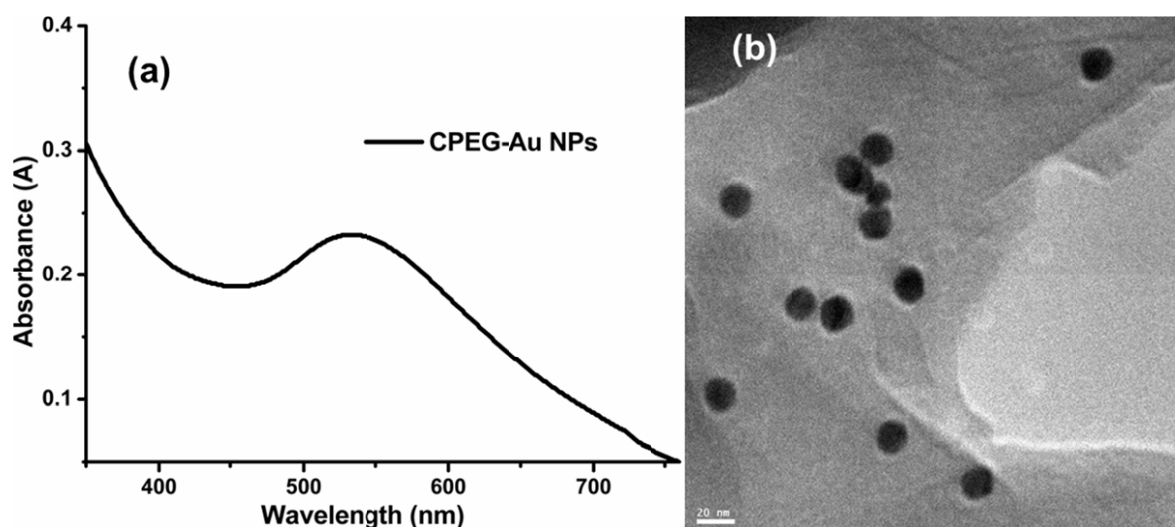

**Fig. S1.** (a) UV-visible spectrum and (b) TEM images of CPEG stabilized AuNPs (scale bar 20 nm).

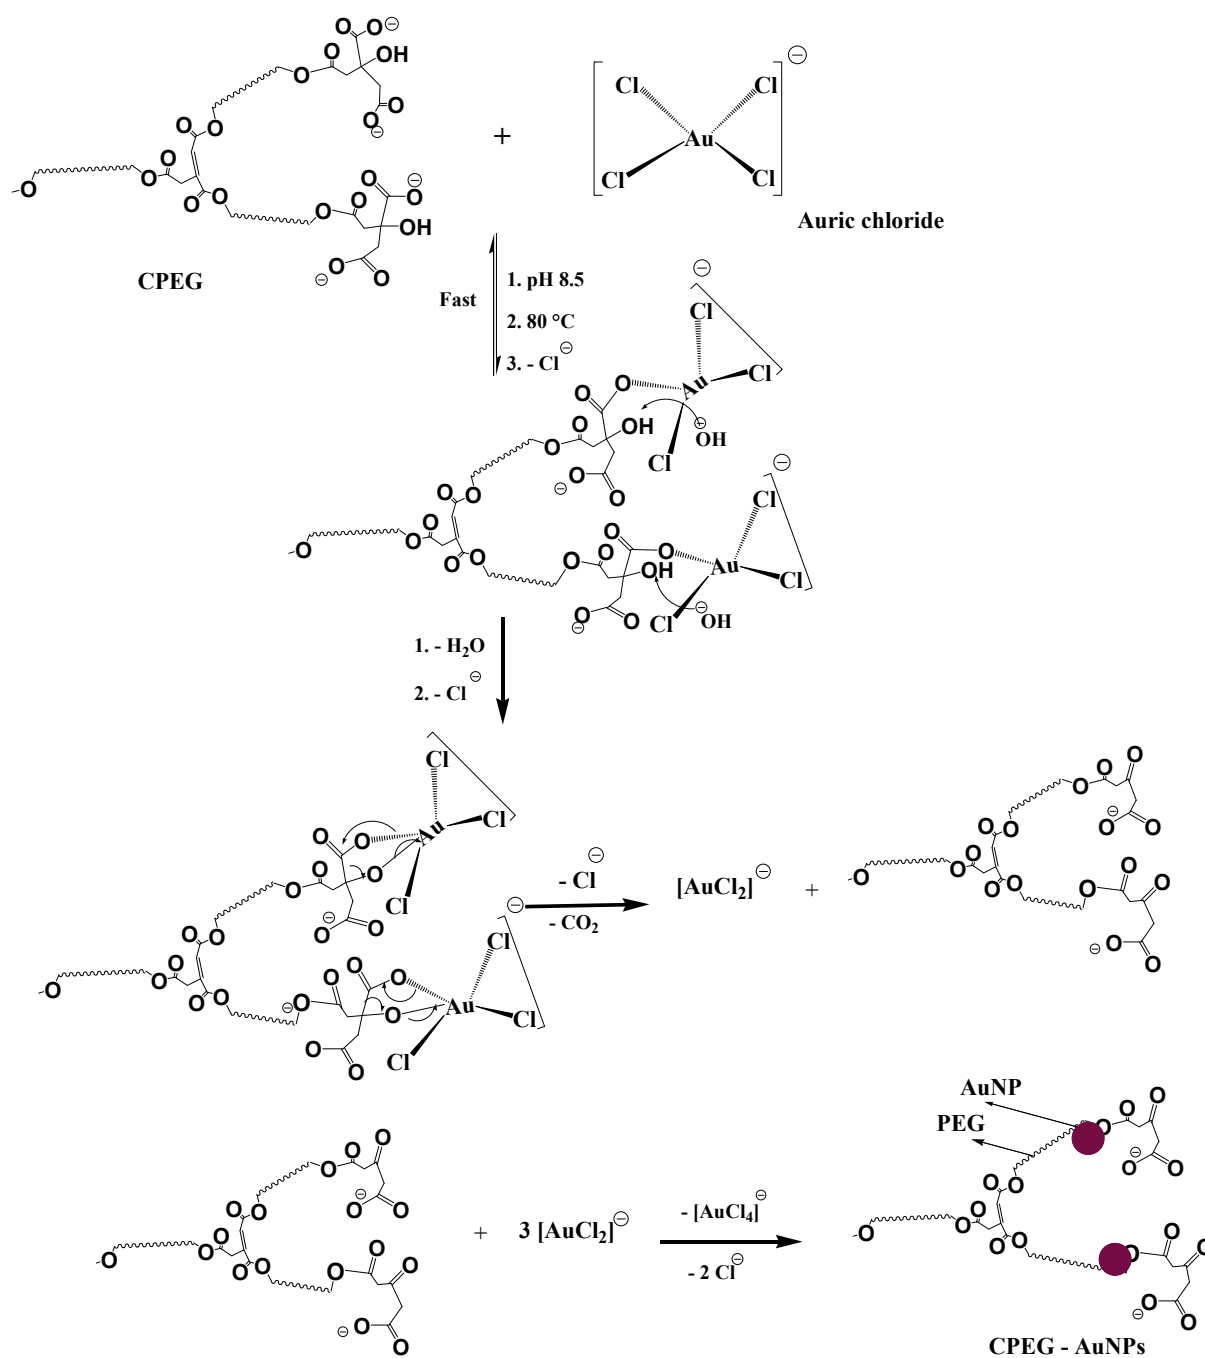

**Scheme S1.** Scheme of synthesis of AuNPs using CPEG.

## 2. Scheme of RIF loaded AuNPs conjugated multiblock copolymer nanoparticles by W/O/W double emulsion technique

### Step-1

#### Formation of W/O single emulsion

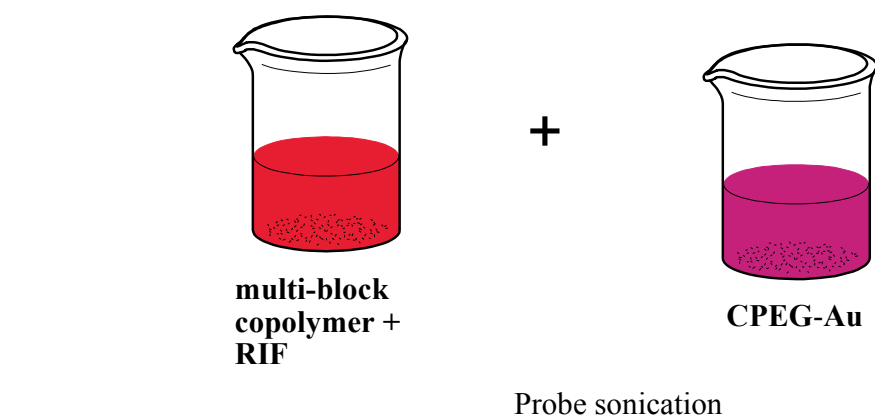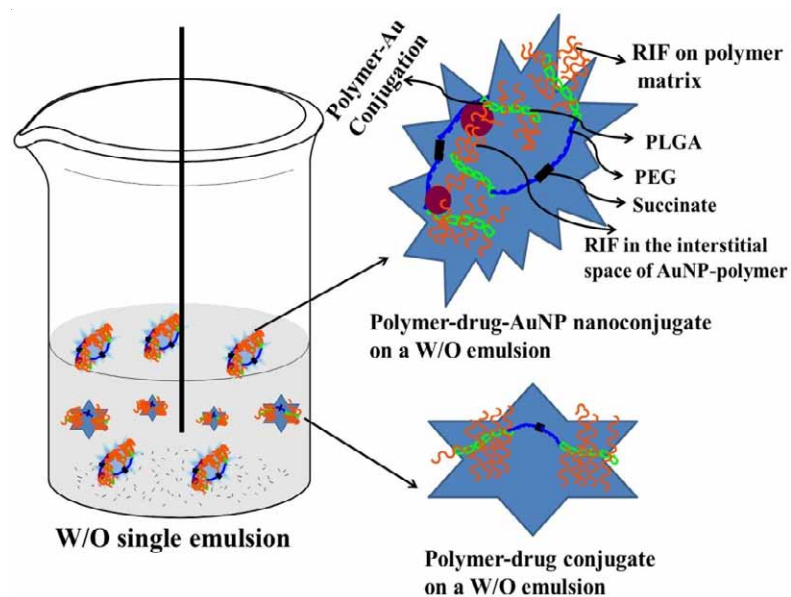

### Step – 2: Formation of W/O/W double emulsion

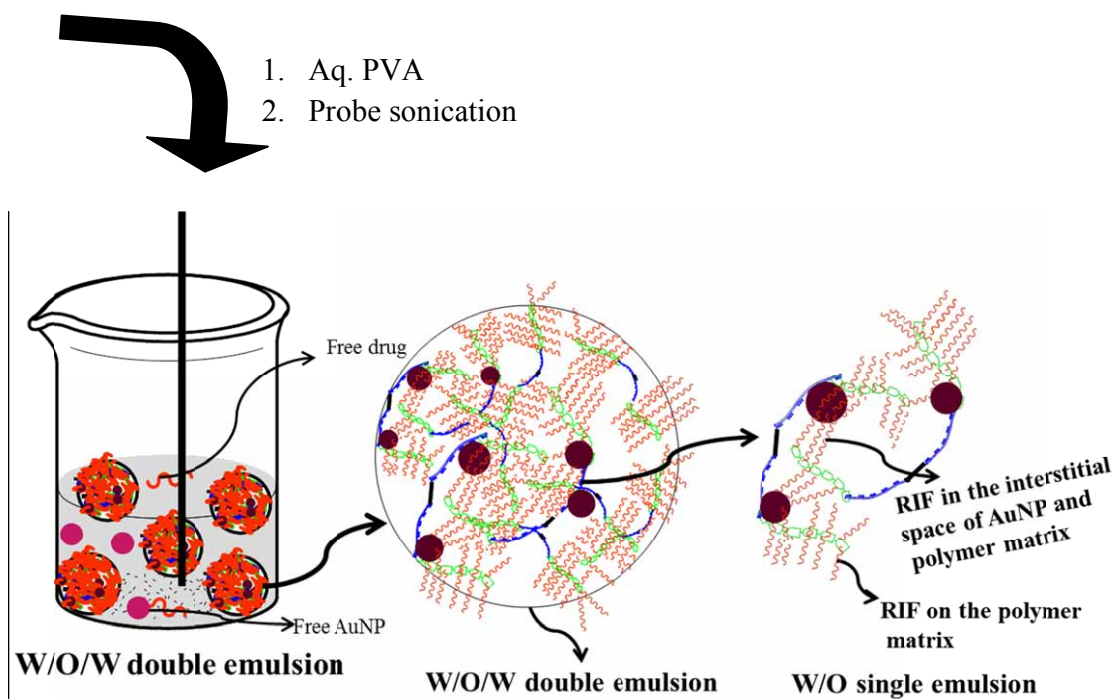

- 
1. Magnetic stirring
  2. Removal of organic solvent
  3. Washing
  4. Vacuum dry

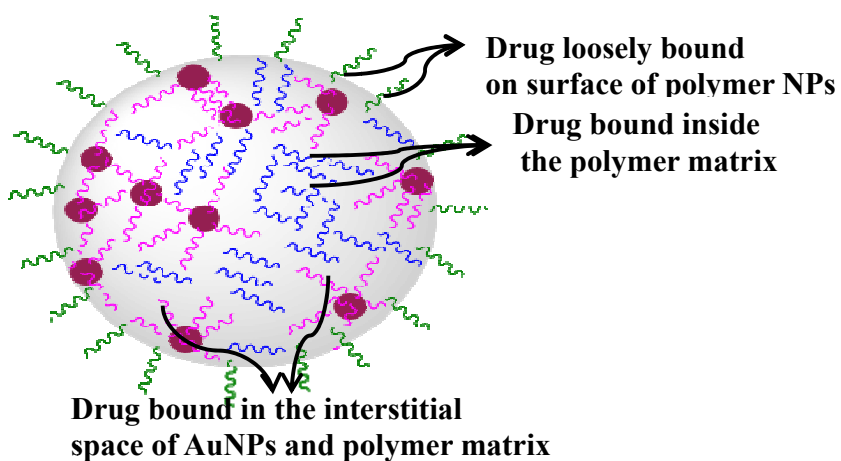

(RIF loaded Au-polymer nanoparticle)

**Scheme S2.** Mechanism of preparation of RIF and AuNPs loaded polymer nanoparticles by W/O/W double emulsion technique.

During the W/O single emulsion,

The polymer-drug-AuNPs nanoconjugates and polymer-drug conjugates are formed on the small W/O emulsion droplets.

In this step,

During the probe sonication, the PEG surrounded AuNPs are detached from the CPEG-Au dendron and capped by the polymer matrix. The capping of AuNPs is favored due to the presence of PEG on AuNPs and the PEG directs the AuNPs to be capped by the multiblock copolymer.

When the multiblock copolymer is used, the capping ability of RIF and AuNPs is favored. When the pure PLGA is used, The PLGA precipitates in faster rate due to its hydrophobic nature and hence, the probability of capping the RIF and AuNPs is minimum resulting in lower drug loading efficiency.

During the W/O/W double emulsification, the small W/O single emulsion droplets form the secondary emulsion with PVA aqueous solution. In this stage, the PVA stabilizes the polymer-drug-Au nanoconjugates and polymer-drug nanoconjugates within a sphere. Hence, after the washing and vacuum dry, a spherical shape polymer NPs are obtained. The drug is present in three different environments in the Au conjugated polymer nanoparticle. In the structure of drug loaded Au-polymer NPs, three different colors have been used to indicate that the drug is present in three different environments.

Where,

Green particles denotes the drug on the surface of polymer NPs, blue particles denotes the drug inside the polymer matrix and red particles denotes the drug in the interstitial space of AuNPs and polymer matrix.

### 3. XPS traces of RIF loaded PLGA-AuNPs nanoconjugates

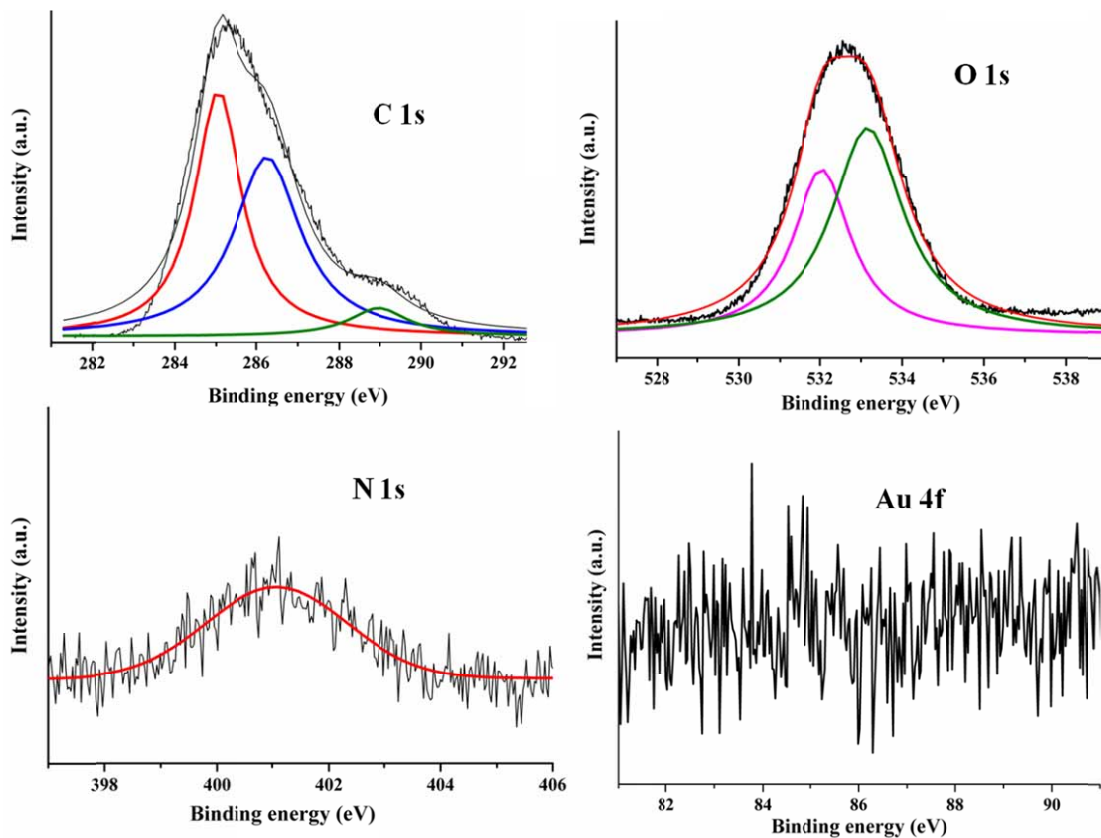

**Fig. S2.** XPS traces of RIF loaded PLGA-Au NPs (PSP0AuR).

#### 4. Pharmacokinetics results of RIF metabolites

The pharmacokinetics values of DRIF, rifampicin quinone (RQ) and rifampicin N-oxide (RNO) obtained for PSPAuR series NPs are given in the Tables S1–S3 and Figs. S3–S5. The area under the curve ( $AUC_{0-\infty}$ ) and maximum concentration ( $C_{max}$ ) values of metabolites are obtained in ng.h/mL and ng/mL respectively while those of RIF are obtained in  $\mu\text{g.h/mL}$  and  $\mu\text{g/mL}$  respectively. Since, the  $C_{max}$  values obtained for the metabolites of RIF are below 25 ng/mL, the quantification of the metabolites may not be accurate. However, it is to be noted that the bioavailability of RIF is increased with lower concentration of the metabolites.

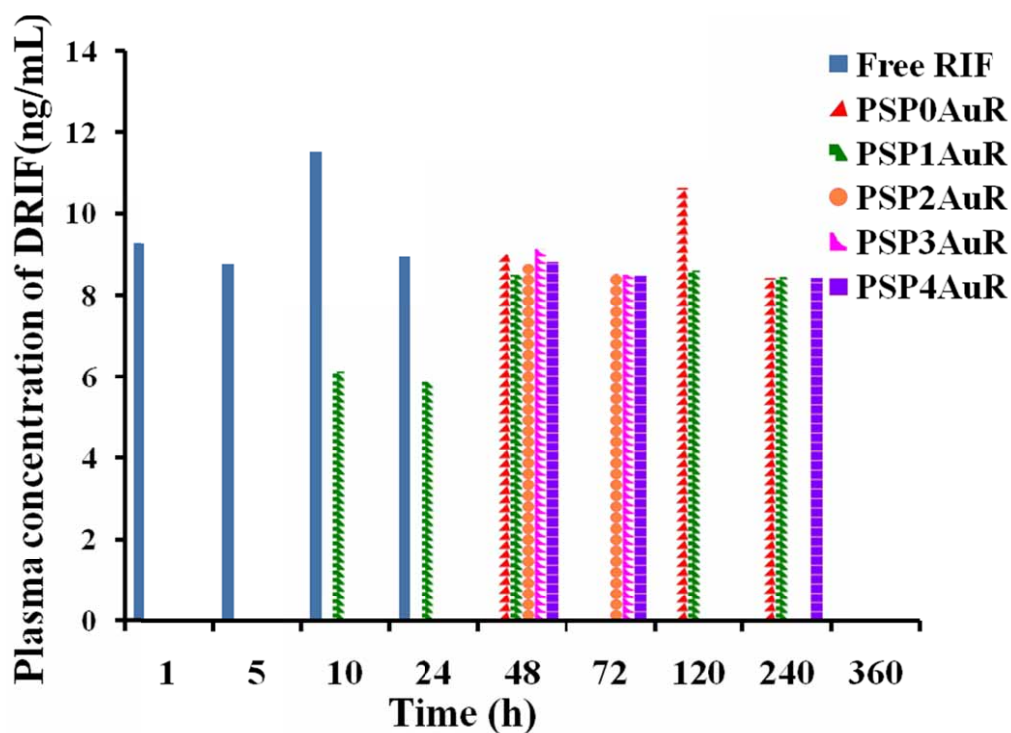

Fig. S3. Histogram of DRIF plasma concentration Vs Time profile.



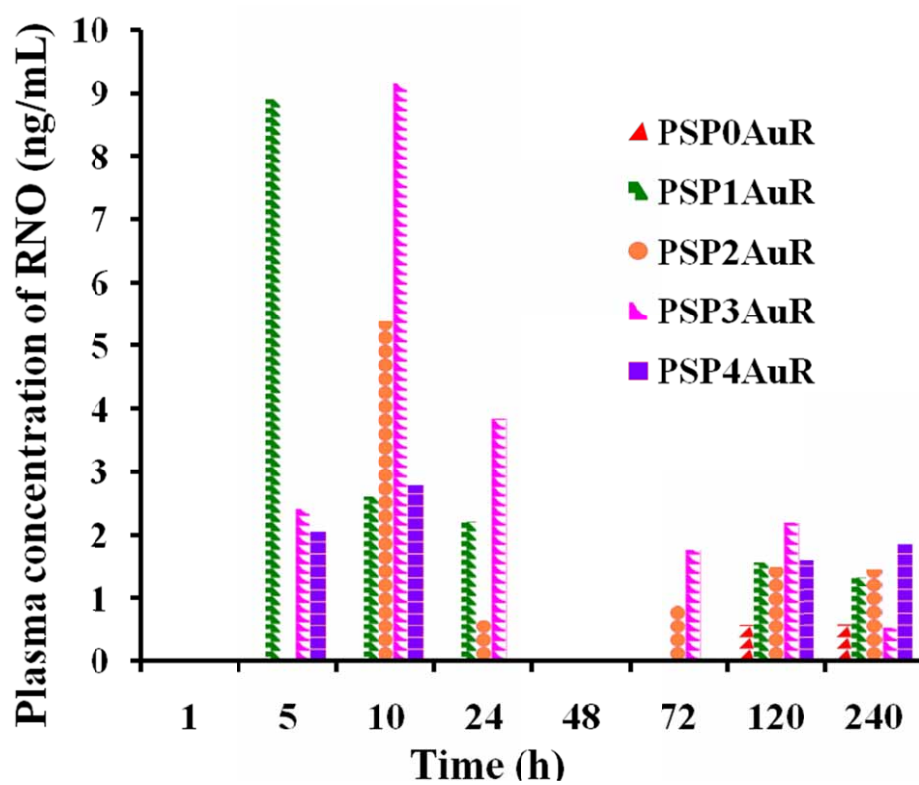

Fig. S4. Histogram of RQ plasma concentration Vs Time profile.

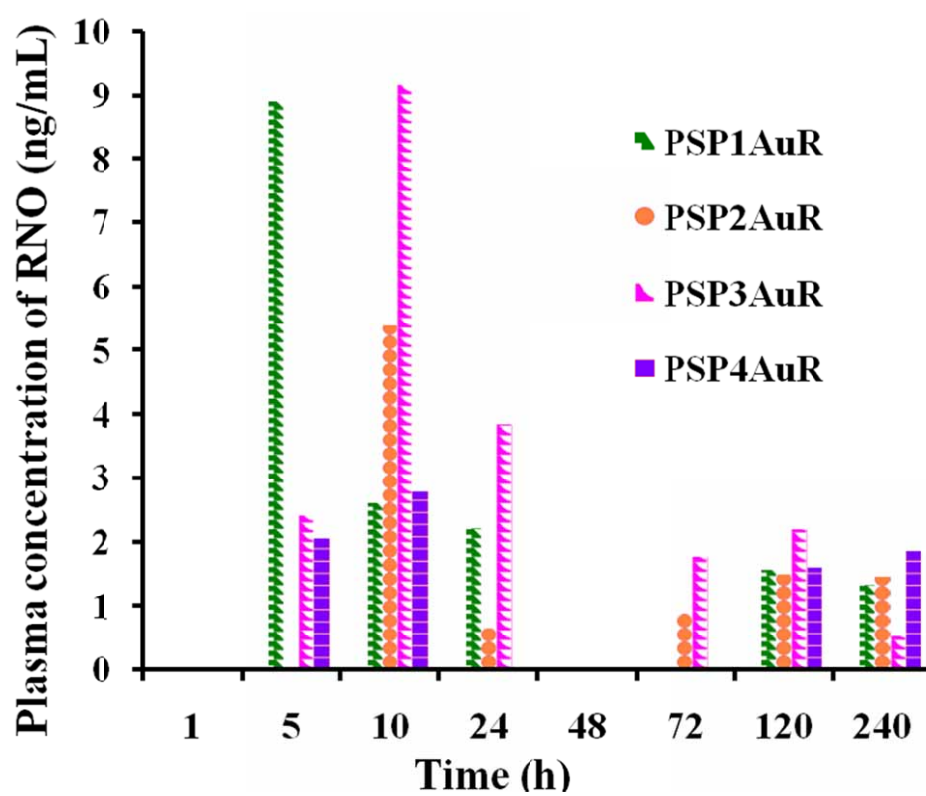

Fig. S5. Histogram of RNO plasma concentration Vs Time profile.

**Table S1.** Pharmacokinetics results of DRIF

| <b>samples</b> | <b>AUC<sub>0-∞</sub><br/>(ng.h/mL)</b> | <b>C<sub>max</sub>(ng/mL)</b> | <b>T<sub>max</sub>(h)</b> | <b>Relative bio<br/>availability</b> | <b>AUC<sub>0-∞DRIF</sub>/<br/>AUC<sub>0-∞RIF</sub></b> |
|----------------|----------------------------------------|-------------------------------|---------------------------|--------------------------------------|--------------------------------------------------------|
| Free RIF       | 342                                    | 11.5                          | 10                        | 1                                    | 0.0182                                                 |
| PSPAu0         | 2122                                   | 10.6                          | 120                       | 6.2                                  | 0.0038                                                 |
| PSPAu1         | 2113                                   | 8.6                           | 120                       | 6.1                                  | 0.0008                                                 |
| PSPAu2         | 518.1                                  | 8.7                           | 48                        | 1.51                                 | 0.0001                                                 |
| PSPAu3         | 525                                    | 9.1                           | 48                        | 1.53                                 | 0.0002                                                 |
| PSPAu4         | 1528                                   | 8.8                           | 48                        | 4.4                                  | 0.0007                                                 |

AUC<sub>0-∞</sub> - Area under the curve

C<sub>max</sub> - maximum concentration

T<sub>max</sub> - Time of maximum concentration

**Table S2.** Pharmacokinetics results of RQ

| <b>samples</b> | <b>AUC<sub>0-∞</sub><br/>(ng.h/mL)</b> | <b>C<sub>max</sub><br/>(ng/mL)</b> | <b>T<sub>max</sub>(h)</b> | <b>Relative bio<br/>availability</b> | <b>AUC<sub>0-∞RQ</sub>/<br/>AUC<sub>0-∞RIF</sub></b> |
|----------------|----------------------------------------|------------------------------------|---------------------------|--------------------------------------|------------------------------------------------------|
| Free RIF       | 2774                                   | 19.45                              | 48                        | 1.0                                  | 0.148                                                |
| PSPAu0         | 2895                                   | 19.72                              | 48                        | 1.04                                 | 0.0052                                               |
| PSPAu1         | 3921                                   | 17.43                              | 24                        | 1.41                                 | 0.0015                                               |
| PSPAu2         | 5210                                   | 23.57                              | 5                         | 1.87                                 | 0.0014                                               |
| PSPAu3         | 4092                                   | 19.00                              | 72                        | 1.47                                 | 0.0015                                               |
| PSPAu4         | 3991                                   | 17.9                               | 10                        | 1.43                                 | 0.0019                                               |

**Table S3.** Pharmacokinetics results of RNO

| <b>samples</b> | <b>AUC<sub>0-∞</sub><br/>(ng.h/mL)</b> | <b>C<sub>max</sub>(ng/mL)</b> | <b>T<sub>max</sub>(h)</b> | <b>Relative<br/>bio<br/>availability</b> | <b>AUC<sub>0-∞RNO</sub>/<br/>AUC<sub>0-∞RIF</sub></b> |
|----------------|----------------------------------------|-------------------------------|---------------------------|------------------------------------------|-------------------------------------------------------|
| Free RIF       | 0                                      | -                             | -                         | -                                        | -                                                     |
| PSPAu0         | 0                                      | -                             | -                         | -                                        | -                                                     |
| PSPAu1         | 399                                    | 8.9                           | 5                         | -                                        | 0.0001                                                |
| PSPAu2         | 396                                    | 5.3                           | 10                        | -                                        | 0.0001                                                |
| PSPAu3         | 481                                    | 9.1                           | 10                        | -                                        | 0.0001                                                |
| PSPAu4         | 392                                    | 2.7                           | 10                        | -                                        | 0.0001                                                |
